# Supplementary material
Source: Springer Nature journal article supplement (https://www.springermedizin.de/resource/supplementary/12887_2013_872_MOESM1_ESM.pdf/9475964)

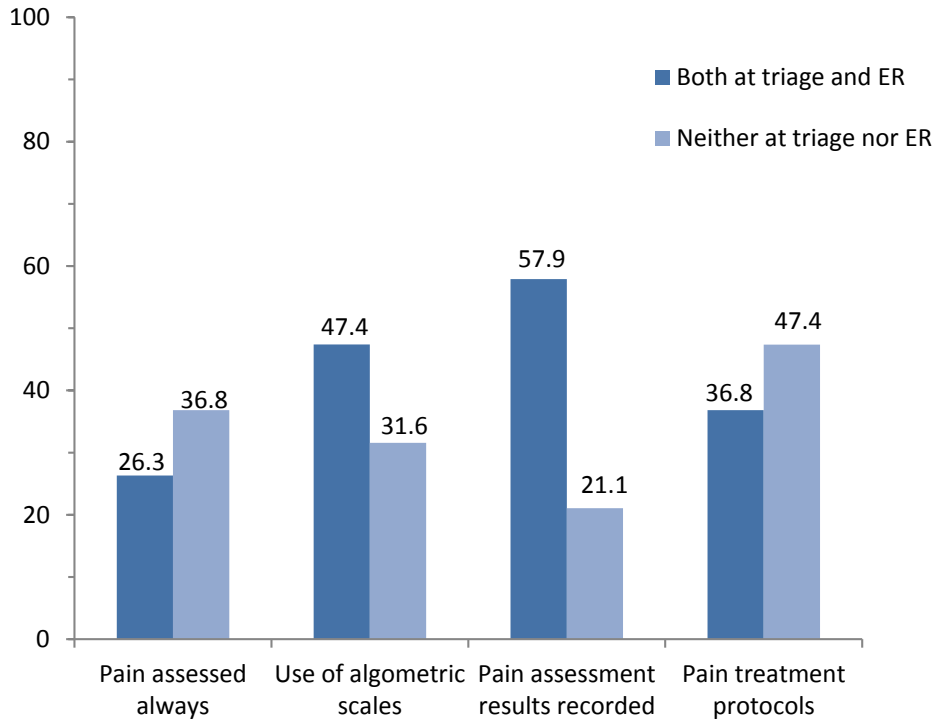

Supplement: MOESM1 [file 9475964]
